# Supplementary material
Source: PubMed Central journal article supplement (PMC6143038)

## Supplementary Online Content

Gaudin O, Toukal F, Hua C, et al. Association between severe acute contact dermatitis due to *Nigella sativa* oil and epidermal apoptosis. *JAMA Dermatol*. Published online August 1, 2018. doi:10.1001/jamadermatol.2018.2120

**eFigure.** Gas Chromatography and Mass Spectrometry of the *Nigella sativa* Oil of Patient Number 6

This supplementary material has been provided by the authors to give readers additional information about their work.

**eFigure.** Gas Chromatography and Mass Spectrometry of the *Nigella sativa* Oil of Patient Number 6

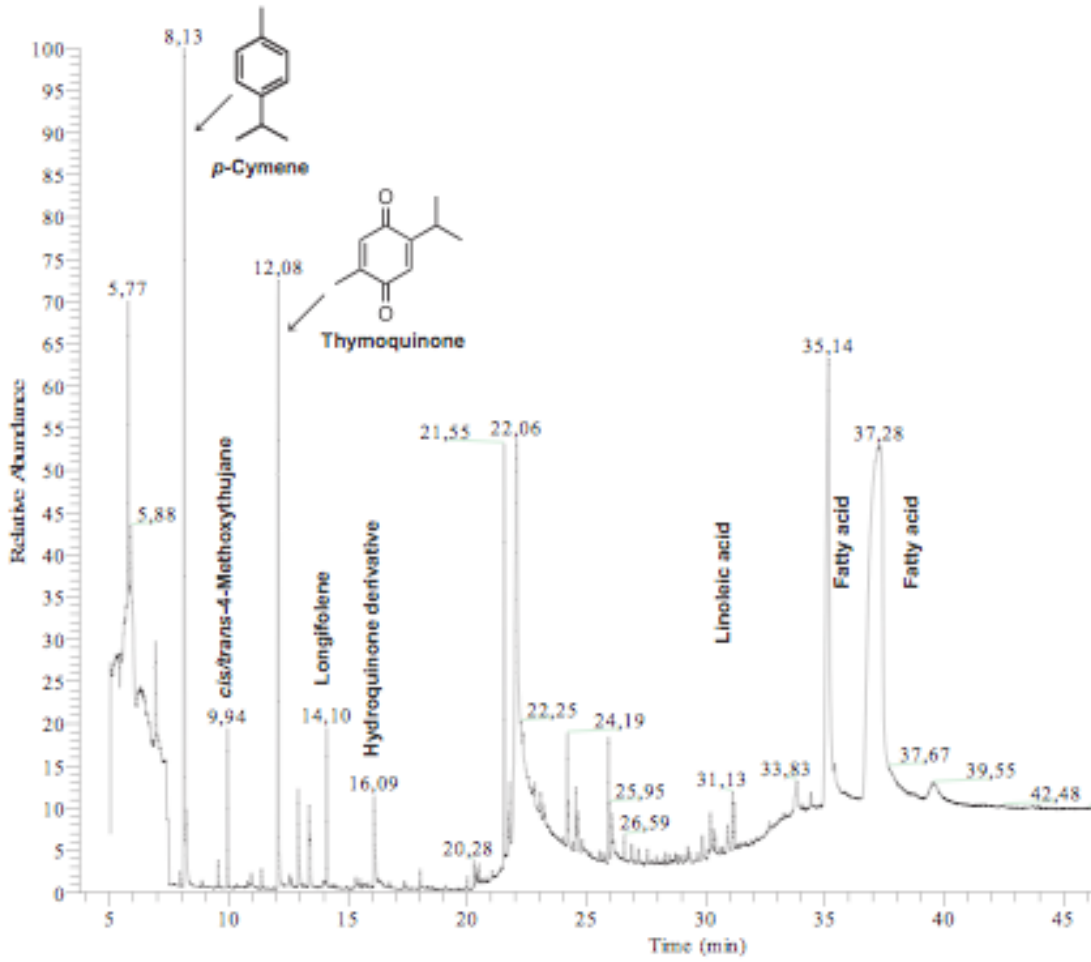

Supplement: jamadermatol-154-1062-s001.pdf [file jamadermatol-154-1062-s001.pdf]
